# Supplementary material for: How can rural community-engaged health services planning achieve sustainable healthcare system changes?
Source: PubMed Central journal article supplement — BMJ Open. 2021 Oct 14;11(10):e047165. doi: 10.1136/bmjopen-2020-047165 (PMC8522661; doi:10.1136/bmjopen-2020-047165), 2021-10-14
Supplement: bmjopen-2020-047165supp004.pdf [file bmjopen-2020-047165supp004.pdf]

Rural Site Visits Project Table 2: List of Top 10 Themes

| Themes                       | Definitions                                                                                                                                                                                                                                                                                                                                                                                                                |
|------------------------------|----------------------------------------------------------------------------------------------------------------------------------------------------------------------------------------------------------------------------------------------------------------------------------------------------------------------------------------------------------------------------------------------------------------------------|
| Areas of Opportunity         | Areas of health care that provide an opportunity to be changed or improved upon within reason. Examples range from old & damaged waiting rooms (infrastructure) to miscommunication between two or more stake holding bodies (relationship building).                                                                                                                                                                      |
| Support                      | Areas in which direct support or additional support is requested by any health care partner in any area.                                                                                                                                                                                                                                                                                                                   |
| Transportation               | All methods of transportation utilized by community members for local and long-distance transport. This section includes specific methods, thoughts, successes and challenges related to local transportation, emergency transportation, accessing areas far away (distance) and environmental factors/conditions.                                                                                                         |
| Successful Initiatives       | Initiatives such as measures, models, programs, methods, or systems that have created a beneficial impact in improving the health care and/or health service delivery of a community.                                                                                                                                                                                                                                      |
| Population                   | Health and non-health related (i.e. community events) aspects of a population that relate to a community's population growth, recruitment, and retention                                                                                                                                                                                                                                                                   |
| Health Authorities           | Any reference to interactions with a communities HA and/or to assistance, successes, challenges brought upon a community through their HA. May also include information regarding communities that declare the presence/absence of their ties with their HA.                                                                                                                                                               |
| Scope of Practice & Workload | The entire role that physicians and/or other health professionals encompass as a rural health care provider. This may include general and or specific skill sets that are required from individuals in a given community. Other concepts included in this section are physician expectations (from self and others), physician wellbeing, and physician burnout (associated with heavy workloads, lack of time off, etc.). |
| Finance                      | Various methods of billing, funding resources, and pay models for physicians within a community. Demonstrates the variety of financial                                                                                                                                                                                                                                                                                     |

|                               |                                                                                                                                                                                                                                                  |
|-------------------------------|--------------------------------------------------------------------------------------------------------------------------------------------------------------------------------------------------------------------------------------------------|
|                               | models (both successful and inadequate) utilized within communities.                                                                                                                                                                             |
| Services                      | Any health-related service that is at risk of becoming extinct or in need because that service is (1) currently not available in the area and (2) currently in significant demand by patients and health providers.                              |
| Patient Capacity & Attachment | Information relating to wait-times for services, family physician availability, or number of beds available within a hospital setting. Includes accounts relating to patient attachment and how patients are attached/unattached in a community. |
